# Supplementary material for: Anti-breast cancer activity of resveratrol encapsulated in liposomes
Source: Royal Society of Chemistry journal article supplement (doi:10.1039/c9tb02051a), 2019-11-14
Supplement: c9tb02051a1.pdf [file c9tb02051a1.pdf]

## SUPPLEMENTARY INFORMATION

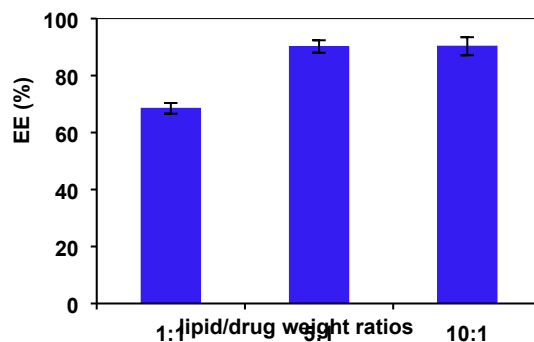

**Fig. S1** The encapsulation efficiency (EE) of PSL@RES, the lipid/drug weight ratios were 1:1, 5:1 and 10:1, respectively. Results were expressed as mean  $\pm$  S.D (n = 3).

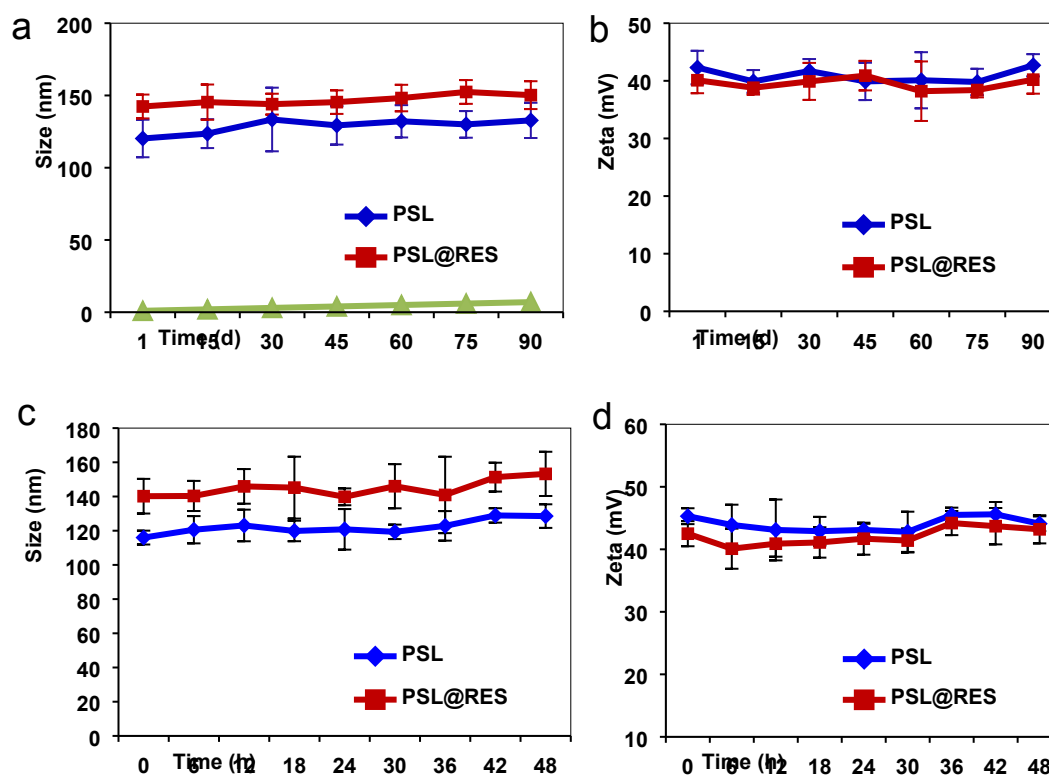

**Fig. S2** The particle size (a) and zeta potential (b) of PSL@RES and PSL for three months in 4 °C environment. The particle size (c) and potential changes (d) of the PSL@RES and PSL in 37 °C simulated body fluid environment for 48 h. Results were expressed as mean  $\pm$  S.D (n = 3).

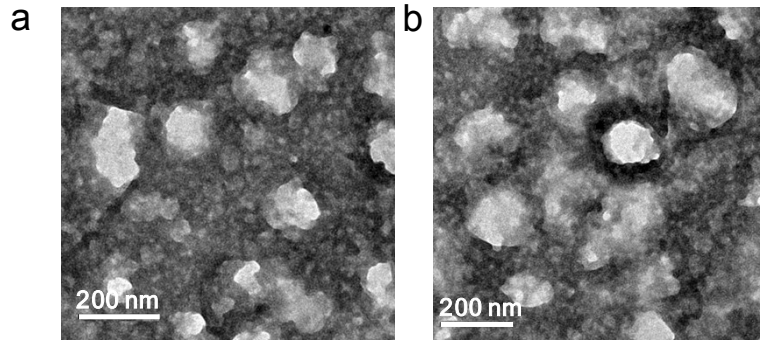

**Fig. S3** Transmission electron microscopy (TEM) images of PSL@RES at 4 °C (a) and 37 °C (b) (8000 ×, Scale bar 200 nm).

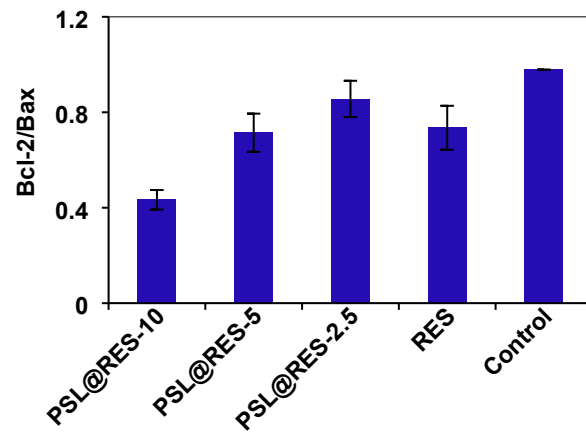

**Fig. S4** Bcl-2 and Bax protein levels were compared by signal intensity. Results were expressed as mean ± S.D. from three-independent experiments.
